# Supplementary material
Source: publisher figshare collection journal article supplement (https://sage.figshare.com/ndownloader/files/24159437)
Supplement: Supplementary file 1 [file 24159437]

**Appendix A**: Regression tables for logit models of accuracy of voters’ evaluations of specific pledges (DV: 1= Accurate Evaluation, 0= Inaccurate evaluation)

|  | (1) | (2) | (3) |
| --- | --- | --- | --- |
|  | All Pledges | Fulfilled Pledges | Unfulfilled Pledges |
| Proposal | -0.0273 | 0.137* | -0.378*** |
|  | (0.0421) | (0.0628) | (0.0738) |
| Government Party ID. | 0.205** | 0.570*** | -0.520*** |
|  | (0.0650) | (0.0998) | (0.117) |
| Opposition Party ID. | -0.0993 | -0.147 | 0.00807 |
|  | (0.0575) | (0.0815) | (0.102) |
| Trust | 0.0302** | 0.0717*** | -0.0588** |
|  | (0.0113) | (0.0174) | (0.0200) |
| Political Knowledge | 0.173*** | 0.232*** | 0.0639* |
|  | (0.0176) | (0.0271) | (0.0305) |
| Media Exposure | 0.0328 | 0.0353 | 0.0505 |
|  | (0.0180) | (0.0271) | (0.0315) |
| Pledge Salience | 0.154*** | 0.621*** |  |
|  | (0.0387) | (0.0411) |  |
| Constant | 0.0878 | -0.381** | 0.665*** |
|  | (0.0947) | (0.135) | (0.161) |
| N | 13455 | 9913 | 3542 |
| Pseudo R-sq | 0.013 | 0.048 | 0.019 |
| Log lik. | -8342.0 | -5648.3 | -2366.8 |
| Chi-squared | 175.2 | 395.9 | 78.26 |
| Standard errors (clustered by respondent) in parentheses  * = p <0.05, ** = p <0.01, *** = p <0.001” | | | |

**Appendix B**: Regression tables for logit models of accuracy of voters’ evaluations of specific pledges by pledges (DV: 1= Accurate Evaluation, 0= Inaccurate evaluation)

|  | (1) | (2) | (3) | (4) | (5) | (6) | (7) |
| --- | --- | --- | --- | --- | --- | --- | --- |
|  |  |  |  |  |  |  |  |
| Proposal | 0.0126 | 0.246* | 0.00350 | 0.402*** | 0.137 | -0.208* | -0.685*** |
|  | (0.105) | (0.110) | (0.0971) | (0.108) | (0.108) | (0.0907) | (0.121) |
| Government Party ID. | 0.425* | 0.671*** | 0.478** | 1.113*** | 0.289 | -0.310* | -0.961*** |
|  | (0.170) | (0.168) | (0.151) | (0.171) | (0.176) | (0.144) | (0.196) |
| Opposition Party ID. | -0.301* | -0.0775 | 0.00551 | -0.0234 | -0.307* | 0.102 | -0.241 |
|  | (0.139) | (0.142) | (0.126) | (0.148) | (0.145) | (0.127) | (0.180) |
| Trust | 0.111*** | 0.0611* | 0.0604* | 0.0754* | 0.0554 | -0.0336 | -0.114*** |
|  | (0.0291) | (0.0291) | (0.0268) | (0.0294) | (0.0302) | (0.0246) | (0.0319) |
| Political Knowledge | 0.214*** | 0.116** | 0.380*** | 0.234*** | 0.258*** | 0.0202 | 0.159*** |
|  | (0.0442) | (0.0437) | (0.0424) | (0.0438) | (0.0462) | (0.0376) | (0.0478) |
| Media Exposure | 0.0980* | -0.0405 | 0.0782 | 0.0820 | -0.0102 | 0.0627 | 0.0568 |
|  | (0.0434) | (0.0452) | (0.0404) | (0.0460) | (0.0452) | (0.0385) | (0.0501) |
| Constant | -0.0297 | -0.00949 | -0.366 | -1.484*** | 0.854*** | -0.0787 | 1.869*** |
|  | (0.205) | (0.210) | (0.197) | (0.227) | (0.215) | (0.196) | (0.264) |
| N | 2063 | 1574 | 2294 | 1557 | 2425 | 2001 | 1541 |
| pseudo R-sq | 0.037 | 0.026 | 0.048 | 0.072 | 0.026 | 0.009 | 0.053 |
| Log lik. | -1107.2 | -983.6 | -1274.7 | -1000.4 | -1104.1 | -1369.5 | -857.0 |
| Chi-squared | 84.21 | 53.27 | 127.8 | 154.6 | 58.18 | 23.86 | 95.24 |
| | Standard errors (clustered by respondent) in parentheses  * = p <0.05, ** = p <0.01, *** = p <0.001” | | --- | | | | | | | | |

**Appendix C:** Regression tables for logit models of accuracy of voters’ evaluations of specific pledges (DV: 1= Accurate Evaluation, 0= Inaccurate evaluation) with pledge dummy.

|  | (1) |
| --- | --- |
|  | All Pledges |
| Proposal | -0.0149 |
|  | (0.0443) |
| Government Party ID. | 0.239*** |
|  | (0.0681) |
| Opposition Party ID. | -0.0839 |
|  | (0.0603) |
| Trust | 0.0313** |
|  | (0.0118) |
| Political Knowledge | 0.190*** |
|  | (0.0186) |
| Media Exposure | 0.0507** |
|  | (0.0189) |
| Pledge 1 | 0.162* |
|  | (0.0814) |
| Pledge 2 | -0.307*** |
|  | (0.0866) |
| Pledge 3 | 0.0126 |
|  | (0.0777) |
| Pledge 4 | -0.905*** |
|  | (0.0850) |
| Pledge 5 | 0.570*** |
|  | (0.0842) |
| Pledge 6 | -1.159*** |
|  | (0.0679) |
| Pledge 7 |  |
|  |  |
| Constant | 0.303** |
|  | (0.104) |
| N | 13455 |
| Pseudo R-sq | 0.069 |
| Log lik. | -7875.7 |
| Chi-squared | 1032.9 |
| Standard errors (clustered by respondent) in parentheses  * = p <0.05, ** = p <0.01, *** = p <0.001” | | |

**References**

Achen, C. H. [1992] Social psychology, demographic variables, and linear regression: Breaking the iron triangle in voting research. *Political Behavior*, 14 [3], 195–211.

Andersen, R., Tilley, J. and Heath, A.F., [2005] Political knowledge and enlightened preferences: party choice through the electoral cycle. *British Journal of Political Science*, 35 [2], pp.285-302.

Artés J [2013] Do Spanish Politicians Keep Their Promises? *Party Politics* 19: 143–58.

Artés J and Bustos A [2008] Electoral Promises and Minority Governments: An Empirical Study. *European Journal of Political Research* 47: 307–33.

Belknap, G., & Campbell, A. [1951]. Political party identification and attitudes toward foreign policy. *Public Opinion Quarterly*, *15* [4], 601–623.

Brewer, P. [2004] International Trust and Public Opinion about World Aﬀairs. *American Journal of Political Science*48, 93–109.

Delli-Carpini, M. X. & Keeter, S. [1996] *What Americans know about politics and why it matters.* Yale University Press.

Downs A [1957] *An Economic Theory of Democracy.* New York: Harper.

Duch, R. M., Palmer, H.D., and Anderson, C.J. [2000] Heterogeneity in Perceptions of National Economic Conditions. American Journal of Political Science 44, 635–652.

Hardin, R. [2002] *Trust and Trustworthiness*. New York, Russell Sage Foundation.

Fiorina MP. (1981) *Retrospective Voting in American National Elections*. New Haven, CT: Yale University Press.

Hetherington, M.J. [2006] *Why Trust Matters: Declining Political Trust and the Demise of American Liberalism*. Princeton, Princeton University Press.

Kalogeropoulou E [1989] Election promises and government performance in Greece: PASOK’s fulfillment of its 1981 election pledges. *European journal of political research* 17 [3]: 289–311.

Kahneman, D. [2003] A Perspective on Judgment and Choice: Mapping Bounded Rationality. *American Psychologist* 58, 697–720.

Kahneman, D., Slovic, P. and Tversky, A. [Eds.] 1982. *Judgment under Uncertainty: Heuristics and Biases*. New York, Cambridge University Press.

Kuklinski, J. and Quirk, P. J. (2000) Reconsidering the Rational Public: Cognition, Heuristics, and Mass Opinion. In: Lupia, A., McCubbins, M. D. and Popkin, S. L. [Eds.], *Elements of Reason: Cognition, Choice and the Bounds of Rationality*. New York, Cambridge University Press, pp. 153–182.

Klingemann HD, Hofferbert RI and Budge I [1994] *Parties, Policies and Democracy*. Boulder: Westview Press.

Kostadinova P [2013] Democratic performance in post-communist Bulgaria: election pledges and levels of fulfillment, 1997–2005. *East European Politics* 29 [2]: 190–207.

Kostadinova P [2015] Party pledges in the news Which election promises do the media report? *Party Politics*. Online First.

Krosnick JA. [1991] Response strategies for coping with the cognitive demands of attitude measures in surveys. *Applied cognitive psychology*, *5* (3): 213-236.

Krukones MG [1984] *Promises and Performance: Presidential Campaigns as Policy Predictors*. Lanham, MD: University Press of America.

Kunda, Z. [1990] The Case for Motivated Political Reasoning. *Psychological Bulletin* 108, 480–498.

Lewis-Beck MS and Stegmaier M. [2000] Economic Determinants of Electoral Outcomes. *Annual Review of Political Science* 3:183–219

Lippman, W. [1922] *Public Opinion.* New York, Harcourt, Brace and Company.

Lupia A [2016] *Uninformed: Why people know so little about politics and what we can do about it*. Oxford University Press.

Maloy, J. S. [2009]. Two Concepts of Trust. *The Journal of Politics* 71, 492–505.

Mansbridge J [2003] Rethinking Representation. *American Political Science Review* 97: 515-28.

Mansergh LE [2004] *Do parties make a difference? The case of governments in Ireland, 1977–1997.* Ph.D. Thesis: Trinity College Dublin.

Mansergh, LE and Thomson R [2007] Election Pledges, Party Competition and Policymaking. *Comparative Politics*39 [3]: 311-29.

Marsh, M., & Tilley, J. [2010]. The attribution of credit and blame to governments and its impact on vote choice. *British Journal of Political Science*, *40* [1], 115.

Miller, W. E. [1991]. Party identification, realignment, and party voting: Back to the basics. *American Political Science Review*, *85* [2], 557–568.

Miller, MK. and Orr, SK. 2008. Experimenting with a “third way” in political knowledge estimation. *Public Opinion Quarterly*. *72* (4): 768-780.

Monière D (1988) *Le discours électoral. Les politiciens sont-ils fiables ?* Montréal: Québec/Amérique.

Moury C [2011] Italian coalitions and electoral promises: assessing the democratic performance of the Prodi I and Berlusconi II governments. *Modern Italy* 16 [1]: 35–50.

Moury C and Fernandes JM [2016] Minority Governments and Pledge Fulfillment: Evidence from Portugal. *Government and Opposition* FirstView Article.

Nadeau, R. and Niemi, R. G. [1995] Educated Guesses: Survey Knowledge Questions. *Public Opinion Quarterly* 59, 323-46.

Naurin E [2011] *Election Promises, Party Behaviour and Voter Perceptions*. New York: Palgrave Macmillan.

Håkansson, N., & Naurin, E. [2016] Promising ever more: An empirical account of Swedish parties’ pledge making during 20 years. *Party Politics*, 22 [3], 393–404.

Naurin E [2013] Is a Promise a Promise? Election Pledge Fulfillment in Comparative Perspective Using Sweden as an Example. *West European Politics* Published online, DOI: 10.1080/01402382.2013.863518

|  |
| --- |

Naurin, E., & Oscarsson, H. E. [2017] When and Why Are Voters Correct in Their Evaluations of Specific Government Performance?. *Political Studies*, 0032321716688359.

Parry, G. [1976] Trust, Distrust, and Consensus. *British Journal of Political Science*6, 129-42.

Patterson. T.E. [1993] *Out of Order*. New York, Knopf.

Pétry F [1988] The Policy Impact of Canadian Party Programs: Public Expenditure Growth and Contagion From the Left. *Public Policy/Analyse de politiques* 14: 376-389.

Pétry F [1995] The Party Agenda Model: Election programmes and Government Spending in Canada. *Canadian Journal of Political Science/Revue canadienne de science politique* 28 : 51-84.

Pétry F [2014] A Tale of Two Perspectives: Election Promises and Government Actions in Canada”: 231–52 in *Canadian Democracy from the Ground Up : Perceptions and Performances* UBC Press, edited by Elisabeth Gidengil and Heather Bastedo. Vancouver.

Pétry, F. and B. Collette. (2009). Measuring How Political Parties Keep Their Promises: A Positive Perspective from Political Science. In *Do They Walk the Talk: Speech and Action in Policy Processes.* L. Imbeau [sous la direction]. New York, Springer, 65–86.

Pétry F and Duval D [2015] The Extent to which Governments Implement Campaign Promises. *Journal of Parliamentary and Political Law/Revue de droit parlementaire et politique*.

Pétry, F. and Duval D. [2017] When Heuristics go Bad: Citizens’s Misevaluations of Campaign Pledge fulfillment. *Electoral Studies*. In Print: Available Online. doi: 10.1016/j.electstud.2017.09.010

Pomper GM and Lederman SS [1980] *Elections in America: Control and Influence in Democratic Politics*, 2nd ed. New York: Longman.

Popkin, S. [1991] *The Reasoning Voter*. Chicago, University of Chicago Press.

Powell, GB. Jr. and Whitten, GD. (1993) A Cross-National Analysis of Economic Voting: Taking Account of the Political Context. *American Journal of Political Science* 37 [2]: 391–414.

Rallings C [1987]. The influence of election programs: Britain and Canada 1945–1979. In Ian Budge, David Robertson and Derek Hearl. eds. *Ideology, Strategy and Party Change: Spatial Analysis of Post-War Election Programs in Nineteen* Democracies. Cambridge: Cambridge University Press.

Rosanvallon, P. and Goldhammer, A. [2013] *Counter-Democracy: Politics in an Age of Distrust.* New York, Cambridge University Press.

Royed TJ [1996] Testing the Mandate Model in Britain and the United States: Evidence from the Reagan and Thatcher Eras. *British Journal of Political Science*26:45–80.

Schermann, K. and Ennser-Jedenastik, L., 2012. Linking election pledges to policy outcomes: the Austrian case. In *ECPR Graduate Conference* [pp. 1–19].

Soroka SN [2014] *Negativity in democratic politics: Causes and consequences*. Cambridge University Press.

Thomson R [2001] The Program to Policy Linkage: The Fulfillment of Election Pledges on Socio-Economic Policy in the Netherlands, 1986–1998. *European Journal of Political Research* 40:171–97.

Thomson R, Royed T, Naurin E, Artés J, Costello R, Ennser-Jedenastik L, Ferguson M, Kostadinova P, Moury C, Pétry F and Praprotnik K, [2017] The fulfillment of parties’ election pledges: a comparative study on the impact of power sharing. *American Journal of Political Science.*

Thomson R [2011] Citizens’ Evaluations of the Fulfillment of Election Pledges: Evidence from Ireland. *The Journal of Politics* 73:187–201.

Thomson, R and Brandenburg, H [2018] Trust and Citizens’ Evaluations of Promise Keeping by Governing Parties. *Political Studies*, DOI: 0032321718764177

Toros E [2015] Piecrust Promises: An Analysis of the Turkish Political Parties’ Electoral Pledges. *Turkish Studies* 16 [2]: 240–252.

Tversky, A. and Kahneman, D. [1972]. Subjective Probability: A Judgment of Representativeness. *Cognitive Psychology* 3, 430-54.

Tversky, A. and Kahneman, D. [1974]. Judgment under Uncertainty. *Science* 185, 1124-31.

Walgrave, S. and De Swert, K., 2007. Where does issue ownership come from? From the party or from the media? Issue-party identifications in Belgium, 1991–2005. *Harvard International Journal of Press/Politics,* 12 [1], pp.37-67.

Zaller, J. 1992. *The Nature and Origins of Mass opinions*. New York, Cambridge University Press
